# Supplementary material for: Distinct Phenotypic and Genomic Signatures Underlie Contrasting Pathogenic Potential of Staphylococcus epidermidis Clonal Lineages
Source: Front Microbiol. 2019 Aug 27;10:1971. doi: 10.3389/fmicb.2019.01971 (PMC6719527; doi:10.3389/fmicb.2019.01971)
Supplement: TABLE S4 — List of genes positively associated to cluster B (Benjamini–Hochberg p < 0.05 and OR > 1). [file Table_4.XLS]

## Sheet: B
Table S4 - List of 244 genes positively associated to cluster B strains (Benjamin-Hochberb p-value<0.05 and OR >1).
Gene	Non-unique Gene name	Annotation	Number_pos_present_in	Number_neg_present_in	Number_pos_not_present_in	Number_neg_not_present_in	Sensitivity	Specificity	Odds_ratio	Naive_p	Bonferroni_p	Benjamini_H_p	Max_Pairwise_comparisons	Max_supporting_pairs	Max_opposing_pairs	Best_pairwise_comp_p	Worst_pairwise_comp_p
group_3799		hypothetical protein - YjgD( ?) formate dehydrogenase activity(?)*	23	0	0	59	100.0	100.0	inf	7.54208519206e-21	3.79291464309e-17	3.79291464309e-17	3	3	0	0.25	0.25
femA_1		Aminoacyltransferase FemA	23	2	0	57	100.0	96.6101694915	inf	2.26262555762e-18	1.13787439293e-14	5.68937196463e-15	3	3	0	0.25	0.25
group_862		Putative formate dehydrogenase	21	0	2	59	91.3043478261	100.0	inf	1.38020159015e-17	6.94103379685e-14	2.31367793228e-14	3	3	0	0.25	0.25
group_865		IS1182 family transposase*	20	0	3	59	86.9565217391	100.0	inf	2.85241661964e-16	1.43448031802e-12	2.04925759717e-13	3	3	0	0.25	0.25
group_866		IS1272 transposase (?)*	23	5	0	54	100.0	91.5254237288	inf	7.41236132676e-16	3.72767651123e-12	3.72767651123e-13	3	3	0	0.25	0.25
group_1340	pckA	Phosphoenolpyruvate carboxykinase (ATP)	23	5	0	54	100.0	91.5254237288	inf	7.41236132676e-16	3.72767651123e-12	3.72767651123e-13	2	2	0	0.5	0.5
group_3058		ABC transporter permease*	22	4	1	55	95.652173913	93.2203389831	302.5	6.3338431443e-15	3.18528971727e-11	1.76960539848e-12	3	2	1	1.0	1.0
group_1368		DeoR family transcriptional regulator - truncated (?)*	23	7	0	52	100.0	88.1355932203	inf	1.5354177034e-14	7.7216156304e-11	4.06400822653e-12	2	2	0	0.5	0.5
group_2026	lytR_1	Transcriptional regulator LytR	22	5	1	54	95.652173913	91.5254237288	237.6	3.36203531607e-14	1.69076756045e-10	7.3511633063e-12	2	2	1	0.5	1.0
group_1884		hypothetical protein	19	1	4	58	82.6086956522	98.3050847458	275.5	8.44315319413e-14	4.24606174133e-10	1.57261545975e-11	3	3	1	0.25	1.0
group_3		hypothetical protein	19	1	4	58	82.6086956522	98.3050847458	275.5	8.44315319413e-14	4.24606174133e-10	1.57261545975e-11	3	3	0	0.25	0.25
group_2372		hypothetical protein	19	1	4	58	82.6086956522	98.3050847458	275.5	8.44315319413e-14	4.24606174133e-10	1.57261545975e-11	3	3	1	0.25	1.0
group_3123		hypothetical protein	19	1	4	58	82.6086956522	98.3050847458	275.5	8.44315319413e-14	4.24606174133e-10	1.57261545975e-11	3	3	1	0.25	1.0
group_1857		hypothetical protein	21	4	2	55	91.3043478261	93.2203389831	144.375	1.53261204771e-13	7.70750598793e-10	2.58452238112e-11	3	2	2	1.0	1.0
group_2336	treP	PTS system trehalose-specific EIIBC component	22	6	1	53	95.652173913	89.8305084746	194.333333333	1.54177115597e-13	7.75356714335e-10	2.58452238112e-11	3	3	1	0.25	1.0
sdpR_2		Transcriptional repressor SdpR	23	9	0	50	100.0	84.7457627119	inf	2.11546439135e-13	1.06386704241e-09	3.43182916907e-11	3	3	0	0.25	0.25
group_1346	acsA	Acetyl-coenzyme A synthetase	20	3	3	56	86.9565217391	94.9152542373	124.444444444	4.37498864354e-13	2.20018178884e-09	6.87556809011e-11	3	3	1	0.25	1.0
group_1497		hypothetical protein	22	8	1	51	95.652173913	86.4406779661	140.25	2.31080364362e-12	1.16210315238e-08	3.32029472107e-10	3	2	1	1.0	1.0
group_1087		hypothetical protein	20	4	3	55	86.9565217391	93.2203389831	91.6666666667	2.49822189633e-12	1.25635579167e-08	3.39555619369e-10	3	2	2	1.0	1.0
group_1543		IS5/IS1182 family transposase - hypothetical protein*	16	0	7	59	69.5652173913	100.0	inf	5.87369630316e-12	2.95388187086e-08	6.71336788832e-10	3	3	0	0.25	0.25
group_18		IS5/IS1182 family transposase*	16	0	7	59	69.5652173913	100.0	inf	5.87369630316e-12	2.95388187086e-08	6.71336788832e-10	3	3	0	0.25	0.25
ssaA2_3		Staphylococcal secretory antigen ssaA2	16	0	7	59	69.5652173913	100.0	inf	5.87369630316e-12	2.95388187086e-08	6.71336788832e-10	2	2	0	0.5	0.5
asp2_2		Accessory Sec system protein Asp2	17	1	6	58	73.9130434783	98.3050847458	164.333333333	1.02358399912e-11	5.1476039316e-08	1.07241748575e-09	2	2	1	0.5	1.0
secA_1		Protein translocase subunit SecA	17	1	6	58	73.9130434783	98.3050847458	164.333333333	1.02358399912e-11	5.1476039316e-08	1.07241748575e-09	2	2	1	0.5	1.0
melR		Melibiose operon regulatory protein	22	10	1	49	95.652173913	83.0508474576	107.8	2.45393869397e-11	1.2340857692e-07	2.51854238612e-09	3	3	1	0.25	1.0
group_948		hypothetical protein	23	14	0	45	100.0	76.2711864407	inf	4.60601689209e-11	2.31636589503e-07	3.99012268846e-09	2	2	0	0.5	0.5
group_1085		hypothetical protein	23	14	0	45	100.0	76.2711864407	inf	4.60601689209e-11	2.31636589503e-07	3.99012268846e-09	2	2	0	0.5	0.5
arsC_2		Glutaredoxin arsenate reductase	23	14	0	45	100.0	76.2711864407	inf	4.60601689209e-11	2.31636589503e-07	3.99012268846e-09	2	2	0	0.5	0.5
esaB		ESAT-6 secretion accessory factor EsaB	15	0	8	59	65.2173913043	100.0	inf	4.9192206539e-11	2.47387606684e-07	3.99012268846e-09	2	2	0	0.5	0.5
esaA		ESAT-6 secretion accessory factor EsaA	15	0	8	59	65.2173913043	100.0	inf	4.9192206539e-11	2.47387606684e-07	3.99012268846e-09	2	2	0	0.5	0.5
group_2392		hypothetical protein	15	0	8	59	65.2173913043	100.0	inf	4.9192206539e-11	2.47387606684e-07	3.99012268846e-09	3	3	0	0.25	0.25
essC		ESAT-6 secretion machinery protein EssC	15	0	8	59	65.2173913043	100.0	inf	4.9192206539e-11	2.47387606684e-07	3.99012268846e-09	2	2	0	0.5	0.5
group_3863		hypothetical protein	15	0	8	59	65.2173913043	100.0	inf	4.9192206539e-11	2.47387606684e-07	3.99012268846e-09	2	2	0	0.5	0.5
esxA		ESAT-6 secretion system extracellular protein A	15	0	8	59	65.2173913043	100.0	inf	4.9192206539e-11	2.47387606684e-07	3.99012268846e-09	2	2	0	0.5	0.5
group_659		hypothetical protein	18	3	5	56	78.2608695652	94.9152542373	67.2	6.0507982504e-11	3.04294644013e-07	4.83007371449e-09	3	3	2	0.25	1.0
group_19		hypothetical protein	16	1	7	58	69.5652173913	98.3050847458	132.571428571	8.98853525181e-11	4.52033437813e-07	6.84899148202e-09	3	3	1	0.25	1.0
group_3911		hypothetical protein	16	1	7	58	69.5652173913	98.3050847458	132.571428571	8.98853525181e-11	4.52033437813e-07	6.84899148202e-09	3	3	1	0.25	1.0
group_787	pnbA	Para-nitrobenzyl esterase	23	15	0	44	100.0	74.5762711864	inf	1.16685761266e-10	5.86812693409e-07	8.75839840908e-09	1	1	0	1.0	1.0
group_1353	tylM1	dTDP-3-amino-3,6-dideoxy-alpha-D-glucopyranose N,N-dimethyltransferase	21	9	2	50	91.3043478261	84.7457627119	58.3333333333	1.45393820394e-10	7.31185522761e-07	1.07527282759e-08	3	3	1	0.25	1.0
group_2445		hypothetical protein	13	0	10	59	56.5217391304	100.0	inf	2.5645537009e-09	1.28971405618e-05	1.79126952247e-07	2	2	0	0.5	0.5
group_904	yhfT	putative acyl--CoA ligase YhfT	22	15	1	44	95.652173913	74.5762711864	64.5333333333	3.22421182447e-09	1.62145612652e-05	2.16194150203e-07	3	3	1	0.25	1.0
group_3098		hypothetical protein	15	2	8	57	65.2173913043	96.6101694915	53.4375	5.26710366676e-09	2.64882643401e-05	3.35294485318e-07	3	3	1	0.25	1.0
group_755		hypothetical protein	15	2	8	57	65.2173913043	96.6101694915	53.4375	5.26710366676e-09	2.64882643401e-05	3.35294485318e-07	3	3	1	0.25	1.0
yezG_1		putative antitoxin YezG	12	0	11	59	52.1739130435	100.0	inf	1.63198871875e-08	8.20727126661e-05	1.00088673983e-06	2	2	0	0.5	0.5
group_24		hypothetical protein	12	0	11	59	52.1739130435	100.0	inf	1.63198871875e-08	8.20727126661e-05	1.00088673983e-06	2	2	0	0.5	0.5
group_1196		hypothetical protein	12	0	11	59	52.1739130435	100.0	inf	1.63198871875e-08	8.20727126661e-05	1.00088673983e-06	1	1	0	1.0	1.0
group_266		hypothetical protein	16	4	7	55	69.5652173913	93.2203389831	31.4285714286	1.85088351243e-08	9.30809318403e-05	1.10810633143e-06	3	3	2	0.25	1.0
yidK_1		putative symporter YidK	15	3	8	56	65.2173913043	94.9152542373	35.0	2.79672147369e-08	0.000140647122912	1.57839401401e-06	3	3	2	0.25	1.0
group_1139	epsF	hypothetical protein	15	3	8	56	65.2173913043	94.9152542373	35.0	2.79672147369e-08	0.000140647122912	1.57839401401e-06	3	2	2	1.0	1.0
group_1396		hypothetical protein	13	1	10	58	56.5217391304	98.3050847458	75.4	3.10719839703e-08	0.000156261007387	1.57839401401e-06	2	2	1	0.5	1.0
group_2400	secY2	Accessory Sec system protein translocase subunit SecY2	13	1	10	58	56.5217391304	98.3050847458	75.4	3.10719839703e-08	0.000156261007387	1.57839401401e-06	2	1	1	1.0	1.0
group_2401		hypothetical protein	13	1	10	58	56.5217391304	98.3050847458	75.4	3.10719839703e-08	0.000156261007387	1.57839401401e-06	2	1	1	1.0	1.0
asp2_1		Accessory Sec system protein Asp2	13	1	10	58	56.5217391304	98.3050847458	75.4	3.10719839703e-08	0.000156261007387	1.57839401401e-06	2	1	1	1.0	1.0
asp3_1		Accessory Sec system protein Asp3	13	1	10	58	56.5217391304	98.3050847458	75.4	3.10719839703e-08	0.000156261007387	1.57839401401e-06	2	1	1	1.0	1.0
group_1900	gtf1_1	Glycosyltransferase Gtf1	13	1	10	58	56.5217391304	98.3050847458	75.4	3.10719839703e-08	0.000156261007387	1.57839401401e-06	2	1	1	1.0	1.0
gtf2_2		Glycosyltransferase-stabilizing protein Gtf2	13	1	10	58	56.5217391304	98.3050847458	75.4	3.10719839703e-08	0.000156261007387	1.57839401401e-06	2	1	1	1.0	1.0
group_2403	secA_1	Protein translocase subunit SecA	13	1	10	58	56.5217391304	98.3050847458	75.4	3.10719839703e-08	0.000156261007387	1.57839401401e-06	2	1	1	1.0	1.0
lpl2		putative lipoprotein	13	1	10	58	56.5217391304	98.3050847458	75.4	3.10719839703e-08	0.000156261007387	1.57839401401e-06	2	2	1	0.5	1.0
group_1398	nos	Nitric oxide synthase oxygenase	14	2	9	57	60.8695652174	96.6101694915	44.3333333333	3.41986177758e-08	0.000171984848794	1.68612596857e-06	3	3	1	0.25	1.0
group_25		hypothetical protein	14	2	9	57	60.8695652174	96.6101694915	44.3333333333	3.41986177758e-08	0.000171984848794	1.68612596857e-06	2	1	2	0.5	1.0
group_1891		hypothetical protein	11	0	12	59	47.8260869565	100.0	inf	9.65593325262e-08	0.000485596883274	4.41451712068e-06	3	3	0	0.25	0.25
yezG_3		putative antitoxin YezG	11	0	12	59	47.8260869565	100.0	inf	9.65593325262e-08	0.000485596883274	4.41451712068e-06	2	2	0	0.5	0.5
group_3909		hypothetical protein	11	0	12	59	47.8260869565	100.0	inf	9.65593325262e-08	0.000485596883274	4.41451712068e-06	1	1	0	1.0	1.0
group_1557		hypothetical protein	11	0	12	59	47.8260869565	100.0	inf	9.65593325262e-08	0.000485596883274	4.41451712068e-06	2	2	0	0.5	0.5
group_3907		NADP-dependent 7-alpha-hydroxysteroid dehydrogenase	11	0	12	59	47.8260869565	100.0	inf	9.65593325262e-08	0.000485596883274	4.41451712068e-06	1	1	0	1.0	1.0
group_3908		hypothetical protein	11	0	12	59	47.8260869565	100.0	inf	9.65593325262e-08	0.000485596883274	4.41451712068e-06	1	1	0	1.0	1.0
group_3182		hypothetical protein	11	0	12	59	47.8260869565	100.0	inf	9.65593325262e-08	0.000485596883274	4.41451712068e-06	1	1	0	1.0	1.0
group_3047		hypothetical protein	23	23	0	36	100.0	61.0169491525	inf	1.06895107289e-07	0.000537575494557	4.84302247349e-06	3	3	0	0.25	0.25
group_1004	ydhP	Inner membrane transport protein YdhP	17	7	6	52	73.9130434783	88.1355932203	21.0476190476	1.10444652886e-07	0.000555426159366	4.9591621372e-06	3	3	2	0.25	1.0
group_978		hypothetical protein	15	4	8	55	65.2173913043	93.2203389831	25.78125	1.17348902076e-07	0.000590147628538	5.17673358367e-06	3	3	2	0.25	1.0
cadC		Cadmium resistance transcriptional regulatory protein CadC	23	24	0	35	100.0	59.3220338983	inf	1.41051325175e-07	0.000709347114307	6.16823577658e-06	3	3	0	0.25	0.25
pls_1		Surface protein	12	1	11	58	52.1739130435	98.3050847458	63.2727272727	1.81383889027e-07	0.000912179577918	7.86361705101e-06	2	1	1	1.0	1.0
sdrG		Serine-aspartate repeat-containing protein G	13	2	10	57	56.5217391304	96.6101694915	37.05	2.01278111755e-07	0.00101222762402	8.50611448754e-06	3	3	1	0.25	1.0
group_594	arsB_1	Arsenical pump membrane protein	13	2	10	57	56.5217391304	96.6101694915	37.05	2.01278111755e-07	0.00101222762402	8.50611448754e-06	3	3	1	0.25	1.0
group_3061		hypothetical protein	15	5	8	54	65.2173913043	91.5254237288	20.25	4.13869102929e-07	0.00208134771863	1.70602272019e-05	3	2	2	1.0	1.0
group_3199		hypothetical protein	10	0	13	59	43.4782608696	100.0	inf	5.34790149376e-07	0.00268945966121	2.05302264215e-05	1	1	0	1.0	1.0
yezG_2		putative antitoxin YezG	10	0	13	59	43.4782608696	100.0	inf	5.34790149376e-07	0.00268945966121	2.05302264215e-05	2	2	0	0.5	0.5
group_3982		hypothetical protein	10	0	13	59	43.4782608696	100.0	inf	5.34790149376e-07	0.00268945966121	2.05302264215e-05	2	2	0	0.5	0.5
bin3_3		Putative transposon Tn552 DNA-invertase bin3	10	0	13	59	43.4782608696	100.0	inf	5.34790149376e-07	0.00268945966121	2.05302264215e-05	1	1	0	1.0	1.0
group_1444	natA	ABC transporter ATP-binding protein NatA	10	0	13	59	43.4782608696	100.0	inf	5.34790149376e-07	0.00268945966121	2.05302264215e-05	1	1	0	1.0	1.0
group_1911		hypothetical protein	10	0	13	59	43.4782608696	100.0	inf	5.34790149376e-07	0.00268945966121	2.05302264215e-05	2	2	0	0.5	0.5
group_107	bin3_3	Putative transposon Tn552 DNA-invertase bin3	10	0	13	59	43.4782608696	100.0	inf	5.34790149376e-07	0.00268945966121	2.05302264215e-05	3	3	0	0.25	0.25
group_980		hypothetical protein	14	4	9	55	60.8695652174	93.2203389831	21.3888888889	6.63570324701e-07	0.00333709516292	2.52810239615e-05	3	3	2	0.25	1.0
group_408	ycnJ	Copper transport protein YcnJ	22	22	1	37	95.652173913	62.7118644068	37.0	8.31057606903e-07	0.00417938870512	3.09584348527e-05	3	2	1	1.0	1.0
group_853		hypothetical protein	13	3	10	56	56.5217391304	94.9152542373	24.2666666667	9.25289252333e-07	0.00465327964998	3.37194177535e-05	3	3	2	0.25	1.0
group_3738		hypothetical protein	13	3	10	56	56.5217391304	94.9152542373	24.2666666667	9.25289252333e-07	0.00465327964998	3.37194177535e-05	3	2	2	1.0	1.0
group_822		hypothetical protein	13	3	10	56	56.5217391304	94.9152542373	24.2666666667	9.25289252333e-07	0.00465327964998	3.37194177535e-05	3	2	1	1.0	1.0
group_1822	tycC	Tyrocidine synthase 3	11	1	12	58	47.8260869565	98.3050847458	53.1666666667	9.79193231252e-07	0.00492436275997	3.49245585813e-05	3	2	1	1.0	1.0
group_1563		hypothetical protein	12	2	11	57	52.1739130435	96.6101694915	31.0909090909	1.08325531937e-06	0.0054476910011	3.83640211345e-05	2	1	1	1.0	1.0
yclQ_2		putative ABC transporter solute-binding protein YclQ	23	28	0	31	100.0	52.5423728814	inf	1.7639426875e-06	0.00887086777543	5.95360253384e-05	1	1	0	1.0	1.0
cof		HMP-PP phosphatase	23	28	0	31	100.0	52.5423728814	inf	1.7639426875e-06	0.00887086777543	5.95360253384e-05	1	1	0	1.0	1.0
essD_3		ESAT-6 secretion machinery protein EssD	9	0	14	59	39.1304347826	100.0	inf	2.78854863603e-06	0.0140236110906	8.93223636344e-05	1	1	0	1.0	1.0
group_3306		hypothetical protein	9	0	14	59	39.1304347826	100.0	inf	2.78854863603e-06	0.0140236110906	8.93223636344e-05	1	1	0	1.0	1.0
group_4402		hypothetical protein	9	0	14	59	39.1304347826	100.0	inf	2.78854863603e-06	0.0140236110906	8.93223636344e-05	1	1	0	1.0	1.0
group_4400		hypothetical protein	9	0	14	59	39.1304347826	100.0	inf	2.78854863603e-06	0.0140236110906	8.93223636344e-05	1	1	0	1.0	1.0
group_4401		hypothetical protein	9	0	14	59	39.1304347826	100.0	inf	2.78854863603e-06	0.0140236110906	8.93223636344e-05	1	1	0	1.0	1.0
essB		ESAT-6 secretion machinery protein EssB	9	0	14	59	39.1304347826	100.0	inf	2.78854863603e-06	0.0140236110906	8.93223636344e-05	2	2	0	0.5	0.5
group_1548		hypothetical protein	9	0	14	59	39.1304347826	100.0	inf	2.78854863603e-06	0.0140236110906	8.93223636344e-05	1	1	0	1.0	1.0
group_4399		hypothetical protein	9	0	14	59	39.1304347826	100.0	inf	2.78854863603e-06	0.0140236110906	8.93223636344e-05	1	1	0	1.0	1.0
group_1866		hypothetical protein - domain 52% protein homology nucleotidyltransferase*	13	4	10	55	56.5217391304	93.2203389831	17.875	3.38253918399e-06	0.0170107895563	0.000106317434727	2	2	2	0.5	0.5
group_864		hypothetical protein -DUF1413 domain containing protein*	20	18	3	41	86.9565217391	69.4915254237	15.1851851852	4.18507598869e-06	0.0210467471471	0.00013072513756	3	3	1	0.25	1.0
group_37		putative lipoprotein	10	1	13	58	43.4782608696	98.3050847458	44.6153846154	4.91709831787e-06	0.0247280874406	0.00014986719661	3	2	1	1.0	1.0
group_1860	tarF	Teichoic acid poly(glycerol phosphate) polymerase	18	13	5	46	78.2608695652	77.9661016949	12.7384615385	5.41808936145e-06	0.0272475713987	0.000163159110172	3	3	2	0.25	1.0
group_501		isoprenylcysteine carboxyl methyltransferase (membrane protein)*	18	13	5	46	78.2608695652	77.9661016949	12.7384615385	5.41808936145e-06	0.0272475713987	0.000163159110172	3	3	2	0.25	1.0
group_224		hypothetical protein	16	10	7	49	69.5652173913	83.0508474576	11.2	1.01029905117e-05	0.0508079392834	0.000287313964082	3	3	2	0.25	1.0
group_307		hypothetical protein	8	0	15	59	34.7826086957	100.0	inf	1.37568399378e-05	0.069183148047	0.000373962962416	1	1	0	1.0	1.0
group_1564		hypothetical protein	8	0	15	59	34.7826086957	100.0	inf	1.37568399378e-05	0.069183148047	0.000373962962416	2	2	0	0.5	0.5
group_4409		hypothetical protein	8	0	15	59	34.7826086957	100.0	inf	1.37568399378e-05	0.069183148047	0.000373962962416	2	2	0	0.5	0.5
group_2543		hypothetical protein	8	0	15	59	34.7826086957	100.0	inf	1.37568399378e-05	0.069183148047	0.000373962962416	2	2	0	0.5	0.5
group_3956		hypothetical protein	8	0	15	59	34.7826086957	100.0	inf	1.37568399378e-05	0.069183148047	0.000373962962416	1	1	0	1.0	1.0
Int-Tn		Transposase from transposon Tn916	20	20	3	39	86.9565217391	66.1016949153	13.0	1.61491323437e-05	0.0812139865565	0.00043429939335	2	1	2	0.5	1.0
group_957		hypothetical protein	11	3	12	56	47.8260869565	94.9152542373	17.1111111111	2.10747386919e-05	0.105984860882	0.000560766459692	3	2	2	1.0	1.0
group_1556		hypothetical protein	9	1	14	58	39.1304347826	98.3050847458	37.2857142857	2.30723750159e-05	0.116030973955	0.000598097803893	3	3	1	0.25	1.0
group_509	zwf_2	Glucose-6-phosphate 1-dehydrogenase	9	1	14	58	39.1304347826	98.3050847458	37.2857142857	2.30723750159e-05	0.116030973955	0.000598097803893	2	2	1	0.5	1.0
dacA		D-alanyl-D-alanine carboxypeptidase DacA	9	1	14	58	39.1304347826	98.3050847458	37.2857142857	2.30723750159e-05	0.116030973955	0.000598097803893	3	3	1	0.25	1.0
group_2349		hypothetical protein	9	1	14	58	39.1304347826	98.3050847458	37.2857142857	2.30723750159e-05	0.116030973955	0.000598097803893	3	2	1	1.0	1.0
group_28		hypothetical protein	10	2	13	57	43.4782608696	96.6101694915	21.9230769231	2.4606623751e-05	0.123746710844	0.000628155892608	2	1	1	1.0	1.0
group_1924		hypothetical protein	10	2	13	57	43.4782608696	96.6101694915	21.9230769231	2.4606623751e-05	0.123746710844	0.000628155892608	2	1	1	1.0	1.0
group_3084		hypothetical protein	13	6	10	53	56.5217391304	89.8305084746	11.4833333333	2.83460720234e-05	0.142552396205	0.000712761981027	3	2	2	1.0	1.0
group_564		hypothetical protein	14	8	9	51	60.8695652174	86.4406779661	9.91666666667	3.91716152928e-05	0.196994053307	0.000951662093273	3	3	2	0.25	1.0
group_958		hypothetical protein	7	0	16	59	30.4347826087	100.0	inf	6.44851872082e-05	0.32429600647	0.00144775002889	1	1	0	1.0	1.0
group_3198		hypothetical protein	7	0	16	59	30.4347826087	100.0	inf	6.44851872082e-05	0.32429600647	0.00144775002889	1	1	0	1.0	1.0
group_3964		hypothetical protein	7	0	16	59	30.4347826087	100.0	inf	6.44851872082e-05	0.32429600647	0.00144775002889	1	1	0	1.0	1.0
group_1938	yezG_2	putative antitoxin YezG	7	0	16	59	30.4347826087	100.0	inf	6.44851872082e-05	0.32429600647	0.00144775002889	2	2	0	0.5	0.5
group_2414	essB	ESAT-6 secretion machinery protein EssB	7	0	16	59	30.4347826087	100.0	inf	6.44851872082e-05	0.32429600647	0.00144775002889	1	1	0	1.0	1.0
essD_1		ESAT-6 secretion machinery protein EssD	7	0	16	59	30.4347826087	100.0	inf	6.44851872082e-05	0.32429600647	0.00144775002889	1	1	0	1.0	1.0
asp3_2		Accessory Sec system protein Asp3	7	0	16	59	30.4347826087	100.0	inf	6.44851872082e-05	0.32429600647	0.00144775002889	1	1	0	1.0	1.0
group_3240	essD_3	ESAT-6 secretion machinery protein EssD	7	0	16	59	30.4347826087	100.0	inf	6.44851872082e-05	0.32429600647	0.00144775002889	2	2	0	0.5	0.5
group_350		Ribonuclease	7	0	16	59	30.4347826087	100.0	inf	6.44851872082e-05	0.32429600647	0.00144775002889	1	1	0	1.0	1.0
group_2441		hypothetical protein	7	0	16	59	30.4347826087	100.0	inf	6.44851872082e-05	0.32429600647	0.00144775002889	3	3	0	0.25	0.25
group_23		hypothetical protein	11	4	12	55	47.8260869565	93.2203389831	12.6041666667	6.63495686827e-05	0.333671980905	0.00147642469427	3	3	1	0.25	1.0
group_2183		hypothetical protein	14	9	9	50	60.8695652174	84.7457627119	8.64197530864	8.63127867488e-05	0.43406700456	0.00186276135531	3	3	1	0.25	1.0
yvgN		Glyoxal reductase	23	35	0	24	100.0	40.6779661017	inf	8.70449231454e-05	0.437748918498	0.00186276135531	2	2	0	0.5	0.5
group_304		hypothetical protein	10	3	13	56	43.4782608696	94.9152542373	14.358974359	8.8738220876e-05	0.446264512785	0.00186721553467	3	2	1	1.0	1.0
group_2023	lysC	Aspartokinase 2	10	3	13	56	43.4782608696	94.9152542373	14.358974359	8.8738220876e-05	0.446264512785	0.00186721553467	3	3	1	0.25	1.0
group_1308		hypothetical protein	10	3	13	56	43.4782608696	94.9152542373	14.358974359	8.8738220876e-05	0.446264512785	0.00186721553467	2	1	2	0.5	1.0
group_1401		hypothetical protein	17	15	6	44	73.9130434783	74.5762711864	8.31111111111	9.82070996264e-05	0.493883504021	0.00205784793342	3	3	2	0.25	1.0
group_959		hypothetical protein	8	1	15	58	34.7826086957	98.3050847458	30.9333333333	0.000101503170352	0.510459443698	0.00206663742388	3	3	1	0.25	1.0
yodJ		Putative carboxypeptidase YodJ	8	1	15	58	34.7826086957	98.3050847458	30.9333333333	0.000101503170352	0.510459443698	0.00206663742388	3	3	1	0.25	1.0
group_2411		hypothetical protein	8	1	15	58	34.7826086957	98.3050847458	30.9333333333	0.000101503170352	0.510459443698	0.00206663742388	2	2	1	0.5	1.0
group_346		hypothetical protein	8	1	15	58	34.7826086957	98.3050847458	30.9333333333	0.000101503170352	0.510459443698	0.00206663742388	2	2	1	0.5	1.0
group_268		hypothetical protein	8	1	15	58	34.7826086957	98.3050847458	30.9333333333	0.000101503170352	0.510459443698	0.00206663742388	2	1	1	1.0	1.0
group_1905		hypothetical protein	8	1	15	58	34.7826086957	98.3050847458	30.9333333333	0.000101503170352	0.510459443698	0.00206663742388	2	2	1	0.5	1.0
group_1		hypothetical protein	14	10	9	49	60.8695652174	83.0508474576	7.62222222222	0.000244562638907	1.0	0.00465873299644	3	3	2	0.25	1.0
group_1542		hypothetical protein	6	0	17	59	26.0869565217	100.0	inf	0.000288286719284	1.0	0.00506920948	2	2	0	0.5	0.5
group_76		hypothetical protein	6	0	17	59	26.0869565217	100.0	inf	0.000288286719284	1.0	0.00506920948	2	2	0	0.5	0.5
group_2419		hypothetical protein	6	0	17	59	26.0869565217	100.0	inf	0.000288286719284	1.0	0.00506920948	2	2	0	0.5	0.5
group_3954		hypothetical protein	6	0	17	59	26.0869565217	100.0	inf	0.000288286719284	1.0	0.00506920948	1	1	0	1.0	1.0
group_68		hypothetical protein	6	0	17	59	26.0869565217	100.0	inf	0.000288286719284	1.0	0.00506920948	3	3	0	0.25	0.25
group_69		hypothetical protein	6	0	17	59	26.0869565217	100.0	inf	0.000288286719284	1.0	0.00506920948	3	3	0	0.25	0.25
group_302		hypothetical protein	6	0	17	59	26.0869565217	100.0	inf	0.000288286719284	1.0	0.00506920948	1	1	0	1.0	1.0
ligI		2-pyrone-4,6-dicarbaxylate hydrolase	6	0	17	59	26.0869565217	100.0	inf	0.000288286719284	1.0	0.00506920948	1	1	0	1.0	1.0
group_1909		hypothetical protein	6	0	17	59	26.0869565217	100.0	inf	0.000288286719284	1.0	0.00506920948	2	2	0	0.5	0.5
treP_1		PTS system trehalose-specific EIIBC component	6	0	17	59	26.0869565217	100.0	inf	0.000288286719284	1.0	0.00506920948	1	1	0	1.0	1.0
treR_2		HTH-type transcriptional regulator TreR	6	0	17	59	26.0869565217	100.0	inf	0.000288286719284	1.0	0.00506920948	1	1	0	1.0	1.0
treA		Trehalose-6-phosphate hydrolase	6	0	17	59	26.0869565217	100.0	inf	0.000288286719284	1.0	0.00506920948	1	1	0	1.0	1.0
group_3164		hypothetical protein	6	0	17	59	26.0869565217	100.0	inf	0.000288286719284	1.0	0.00506920948	2	2	0	0.5	0.5
group_1309		hypothetical protein	6	0	17	59	26.0869565217	100.0	inf	0.000288286719284	1.0	0.00506920948	2	2	0	0.5	0.5
group_3953		hypothetical protein	6	0	17	59	26.0869565217	100.0	inf	0.000288286719284	1.0	0.00506920948	1	1	0	1.0	1.0
group_3952		hypothetical protein	6	0	17	59	26.0869565217	100.0	inf	0.000288286719284	1.0	0.00506920948	1	1	0	1.0	1.0
group_3955		hypothetical protein	6	0	17	59	26.0869565217	100.0	inf	0.000288286719284	1.0	0.00506920948	1	1	0	1.0	1.0
group_2409		hypothetical protein	6	0	17	59	26.0869565217	100.0	inf	0.000288286719284	1.0	0.00506920948	2	2	0	0.5	0.5
group_1319		hypothetical protein	6	0	17	59	26.0869565217	100.0	inf	0.000288286719284	1.0	0.00506920948	2	2	0	0.5	0.5
group_3866		hypothetical protein	6	0	17	59	26.0869565217	100.0	inf	0.000288286719284	1.0	0.00506920948	2	2	0	0.5	0.5
group_3344		hypothetical protein	6	0	17	59	26.0869565217	100.0	inf	0.000288286719284	1.0	0.00506920948	1	1	0	1.0	1.0
group_1549		hypothetical protein	9	3	14	56	39.1304347826	94.9152542373	12.0	0.000345264609376	1.0	0.00602894347414	3	2	2	1.0	1.0
group_1337	ssaA_2	Staphylococcal secretory antigen SsaA	8	2	15	57	34.7826086957	96.6101694915	15.2	0.000415226351694	1.0	0.00712866897106	2	1	1	1.0	1.0
group_761		hypothetical protein	8	2	15	57	34.7826086957	96.6101694915	15.2	0.000415226351694	1.0	0.00712866897106	3	2	2	1.0	1.0
group_32		hypothetical protein	8	2	15	57	34.7826086957	96.6101694915	15.2	0.000415226351694	1.0	0.00712866897106	3	3	1	0.25	1.0
group_1416	pbuE	Purine efflux pump PbuE	8	2	15	57	34.7826086957	96.6101694915	15.2	0.000415226351694	1.0	0.00712866897106	2	2	1	0.5	1.0
group_86	sdrG	Serine-aspartate repeat-containing protein G	7	1	16	58	30.4347826087	98.3050847458	25.375	0.000419583618102	1.0	0.00712866897106	2	2	1	0.5	1.0
group_1240		hypothetical protein	7	1	16	58	30.4347826087	98.3050847458	25.375	0.000419583618102	1.0	0.00712866897106	2	2	1	0.5	1.0
group_505	zwf_3	Glucose-6-phosphate 1-dehydrogenase	7	1	16	58	30.4347826087	98.3050847458	25.375	0.000419583618102	1.0	0.00712866897106	2	1	1	1.0	1.0
group_844		hypothetical protein	22	33	1	26	95.652173913	44.0677966102	17.3333333333	0.000460541547153	1.0	0.0076690842405	3	2	1	1.0	1.0
zupT		Zinc transporter ZupT	22	33	1	26	95.652173913	44.0677966102	17.3333333333	0.000460541547153	1.0	0.0076690842405	2	2	1	0.5	1.0
group_2379		hypothetical protein	10	5	13	54	43.4782608696	91.5254237288	8.30769230769	0.000640991641643	1.0	0.0103985385994	3	3	1	0.25	1.0
ydaF		Putative ribosomal N-acetyltransferase YdaF	23	40	0	19	100.0	32.2033898305	inf	0.000971271545851	1.0	0.0156555275772	2	2	0	0.5	0.5
group_2174		hypothetical protein	12	8	11	51	52.1739130435	86.4406779661	6.95454545455	0.0010022024445	1.0	0.0160511977496	2	2	1	0.5	1.0
group_1064		hypothetical protein	5	0	18	59	21.7391304348	100.0	inf	0.00123322652138	1.0	0.0165826100963	3	3	0	0.25	0.25
crtN		Dehydrosqualene desaturase	5	0	18	59	21.7391304348	100.0	inf	0.00123322652138	1.0	0.0165826100963	3	3	0	0.25	0.25
crtM		Dehydrosqualene synthase	5	0	18	59	21.7391304348	100.0	inf	0.00123322652138	1.0	0.0165826100963	3	3	0	0.25	0.25
group_3104	soj	Chromosome-partitioning ATPase Soj	5	0	18	59	21.7391304348	100.0	inf	0.00123322652138	1.0	0.0165826100963	1	1	0	1.0	1.0
group_3103		hypothetical protein	5	0	18	59	21.7391304348	100.0	inf	0.00123322652138	1.0	0.0165826100963	1	1	0	1.0	1.0
crtQ		4,4'-diaponeurosporenoate glycosyltransferase	5	0	18	59	21.7391304348	100.0	inf	0.00123322652138	1.0	0.0165826100963	3	3	0	0.25	0.25
crtP		Diapolycopene oxygenase	5	0	18	59	21.7391304348	100.0	inf	0.00123322652138	1.0	0.0165826100963	3	3	0	0.25	0.25
group_3818		hypothetical protein	5	0	18	59	21.7391304348	100.0	inf	0.00123322652138	1.0	0.0165826100963	1	1	0	1.0	1.0
group_2406		hypothetical protein	5	0	18	59	21.7391304348	100.0	inf	0.00123322652138	1.0	0.0165826100963	1	1	0	1.0	1.0
group_3817		putative oxidoreductase	5	0	18	59	21.7391304348	100.0	inf	0.00123322652138	1.0	0.0165826100963	2	2	0	0.5	0.5
group_2407		hypothetical protein	5	0	18	59	21.7391304348	100.0	inf	0.00123322652138	1.0	0.0165826100963	1	1	0	1.0	1.0
group_2383		Alkaline shock protein 23	5	0	18	59	21.7391304348	100.0	inf	0.00123322652138	1.0	0.0165826100963	1	1	0	1.0	1.0
cueR		HTH-type transcriptional regulator CueR	5	0	18	59	21.7391304348	100.0	inf	0.00123322652138	1.0	0.0165826100963	2	2	0	0.5	0.5
group_4658		hypothetical protein	5	0	18	59	21.7391304348	100.0	inf	0.00123322652138	1.0	0.0165826100963	1	1	0	1.0	1.0
group_4656		hypothetical protein	5	0	18	59	21.7391304348	100.0	inf	0.00123322652138	1.0	0.0165826100963	1	1	0	1.0	1.0
group_4657		hypothetical protein	5	0	18	59	21.7391304348	100.0	inf	0.00123322652138	1.0	0.0165826100963	1	1	0	1.0	1.0
group_4654		hypothetical protein	5	0	18	59	21.7391304348	100.0	inf	0.00123322652138	1.0	0.0165826100963	1	1	0	1.0	1.0
group_4653		hypothetical protein	5	0	18	59	21.7391304348	100.0	inf	0.00123322652138	1.0	0.0165826100963	1	1	0	1.0	1.0
group_3771		hypothetical protein	5	0	18	59	21.7391304348	100.0	inf	0.00123322652138	1.0	0.0165826100963	1	1	0	1.0	1.0
group_3770		hypothetical protein	5	0	18	59	21.7391304348	100.0	inf	0.00123322652138	1.0	0.0165826100963	1	1	0	1.0	1.0
group_3819		hypothetical protein	5	0	18	59	21.7391304348	100.0	inf	0.00123322652138	1.0	0.0165826100963	1	1	0	1.0	1.0
group_3813		hypothetical protein	5	0	18	59	21.7391304348	100.0	inf	0.00123322652138	1.0	0.0165826100963	2	2	0	0.5	0.5
panE_2		2-dehydropantoate 2-reductase	5	0	18	59	21.7391304348	100.0	inf	0.00123322652138	1.0	0.0165826100963	1	1	0	1.0	1.0
group_305		hypothetical protein	5	0	18	59	21.7391304348	100.0	inf	0.00123322652138	1.0	0.0165826100963	1	1	0	1.0	1.0
group_1904		hypothetical protein	5	0	18	59	21.7391304348	100.0	inf	0.00123322652138	1.0	0.0165826100963	3	3	0	0.25	0.25
group_1907		hypothetical protein	5	0	18	59	21.7391304348	100.0	inf	0.00123322652138	1.0	0.0165826100963	2	2	0	0.5	0.5
group_2462		hypothetical protein	5	0	18	59	21.7391304348	100.0	inf	0.00123322652138	1.0	0.0165826100963	2	2	0	0.5	0.5
group_3162		hypothetical protein	5	0	18	59	21.7391304348	100.0	inf	0.00123322652138	1.0	0.0165826100963	2	2	0	0.5	0.5
group_575		hypothetical protein	5	0	18	59	21.7391304348	100.0	inf	0.00123322652138	1.0	0.0165826100963	1	1	0	1.0	1.0
group_1303		hypothetical protein	5	0	18	59	21.7391304348	100.0	inf	0.00123322652138	1.0	0.0165826100963	1	1	0	1.0	1.0
group_3122		Glycosyl-4,4'-diaponeurosporenoate acyltransferase - crtO*	5	0	18	59	21.7391304348	100.0	inf	0.00123322652138	1.0	0.0165826100963	3	3	0	0.25	0.25
group_3820		hypothetical protein	5	0	18	59	21.7391304348	100.0	inf	0.00123322652138	1.0	0.0165826100963	1	1	0	1.0	1.0
group_200	essD_1	ESAT-6 secretion machinery protein EssD	5	0	18	59	21.7391304348	100.0	inf	0.00123322652138	1.0	0.0165826100963	2	2	0	0.5	0.5
group_634		3-hexulose-6-phosphate synthase	5	0	18	59	21.7391304348	100.0	inf	0.00123322652138	1.0	0.0165826100963	2	2	0	0.5	0.5
group_3865		hypothetical protein	5	0	18	59	21.7391304348	100.0	inf	0.00123322652138	1.0	0.0165826100963	2	2	0	0.5	0.5
dapE_3		putative succinyl-diaminopimelate desuccinylase	5	0	18	59	21.7391304348	100.0	inf	0.00123322652138	1.0	0.0165826100963	1	1	0	1.0	1.0
group_2382		Alkaline shock protein 23	5	0	18	59	21.7391304348	100.0	inf	0.00123322652138	1.0	0.0165826100963	1	1	0	1.0	1.0
group_4822		hypothetical protein	5	0	18	59	21.7391304348	100.0	inf	0.00123322652138	1.0	0.0165826100963	1	1	0	1.0	1.0
group_4828		hypothetical protein	5	0	18	59	21.7391304348	100.0	inf	0.00123322652138	1.0	0.0165826100963	1	1	0	1.0	1.0
group_3183		hypothetical protein	5	0	18	59	21.7391304348	100.0	inf	0.00123322652138	1.0	0.0165826100963	2	2	0	0.5	0.5
mtlR		Transcriptional regulator MtlR	5	0	18	59	21.7391304348	100.0	inf	0.00123322652138	1.0	0.0165826100963	1	1	0	1.0	1.0
mtlA		PTS system mannitol-specific EIICB component	5	0	18	59	21.7391304348	100.0	inf	0.00123322652138	1.0	0.0165826100963	1	1	0	1.0	1.0
hxlR_1		HTH-type transcriptional activator HxlR	5	0	18	59	21.7391304348	100.0	inf	0.00123322652138	1.0	0.0165826100963	1	1	0	1.0	1.0
group_3821		hypothetical protein	5	0	18	59	21.7391304348	100.0	inf	0.00123322652138	1.0	0.0165826100963	1	1	0	1.0	1.0
group_4652		hypothetical protein	5	0	18	59	21.7391304348	100.0	inf	0.00123322652138	1.0	0.0165826100963	1	1	0	1.0	1.0
group_3163		hypothetical protein	5	0	18	59	21.7391304348	100.0	inf	0.00123322652138	1.0	0.0165826100963	2	2	0	0.5	0.5
group_635		3-hexulose-6-phosphate synthase	5	0	18	59	21.7391304348	100.0	inf	0.00123322652138	1.0	0.0165826100963	2	2	0	0.5	0.5
group_3138		hypothetical protein	5	0	18	59	21.7391304348	100.0	inf	0.00123322652138	1.0	0.0165826100963	1	1	0	1.0	1.0
group_1539		hypothetical protein	5	0	18	59	21.7391304348	100.0	inf	0.00123322652138	1.0	0.0165826100963	1	1	0	1.0	1.0
group_1101		hypothetical protein	5	0	18	59	21.7391304348	100.0	inf	0.00123322652138	1.0	0.0165826100963	1	1	0	1.0	1.0
group_4646		hypothetical protein	5	0	18	59	21.7391304348	100.0	inf	0.00123322652138	1.0	0.0165826100963	1	1	0	1.0	1.0
group_3407		hypothetical protein	5	0	18	59	21.7391304348	100.0	inf	0.00123322652138	1.0	0.0165826100963	1	1	0	1.0	1.0
group_4655		hypothetical protein	5	0	18	59	21.7391304348	100.0	inf	0.00123322652138	1.0	0.0165826100963	1	1	0	1.0	1.0
group_3854		hypothetical protein	5	0	18	59	21.7391304348	100.0	inf	0.00123322652138	1.0	0.0165826100963	3	3	0	0.25	0.25
group_863		Putative formate dehydrogenase	5	0	18	59	21.7391304348	100.0	inf	0.00123322652138	1.0	0.0165826100963	2	2	0	0.5	0.5
group_27		hypothetical protein	10	6	13	53	43.4782608696	89.8305084746	6.79487179487	0.00141289890383	1.0	0.0188975228387	2	1	1	1.0	1.0
group_46		putative lipoprotein	10	6	13	53	43.4782608696	89.8305084746	6.79487179487	0.00141289890383	1.0	0.0188975228387	2	2	1	0.5	1.0
group_1903		hypothetical protein	7	2	16	57	30.4347826087	96.6101694915	12.46875	0.00153286518523	1.0	0.0202862605698	2	1	1	1.0	1.0
group_1690	opuCA_1	Carnitine transport ATP-binding protein OpuCA	7	2	16	57	30.4347826087	96.6101694915	12.46875	0.00153286518523	1.0	0.0202862605698	3	2	1	1.0	1.0
yidK_2		putative symporter YidK	6	1	17	58	26.0869565217	98.3050847458	20.4705882353	0.00163109591174	1.0	0.0211958174164	2	2	1	0.5	1.0
group_803	isaB_2	Immunodominant staphylococcal antigen B	6	1	17	58	26.0869565217	98.3050847458	20.4705882353	0.00163109591174	1.0	0.0211958174164	2	2	1	0.5	1.0
yezG_5		putative antitoxin YezG	6	1	17	58	26.0869565217	98.3050847458	20.4705882353	0.00163109591174	1.0	0.0211958174164	3	2	1	1.0	1.0
group_3311		hypothetical protein	6	1	17	58	26.0869565217	98.3050847458	20.4705882353	0.00163109591174	1.0	0.0211958174164	2	2	1	0.5	1.0
group_2855		hypothetical protein	6	1	17	58	26.0869565217	98.3050847458	20.4705882353	0.00163109591174	1.0	0.0211958174164	2	2	1	0.5	1.0
group_715		hypothetical protein	6	1	17	58	26.0869565217	98.3050847458	20.4705882353	0.00163109591174	1.0	0.0211958174164	2	1	1	1.0	1.0
group_3236		hypothetical protein	8	4	15	55	34.7826086957	93.2203389831	7.33333333333	0.00303879168863	1.0	0.0374560867699	3	3	1	0.25	1.0
Legend:
*- Hypothetical protein from which possible annotation was obtained from blasting against the NCBI non-redundant protein database.
