# Supplementary material for: Distinct Phenotypic and Genomic Signatures Underlie Contrasting Pathogenic Potential of Staphylococcus epidermidis Clonal Lineages
Source: Front Microbiol. 2019 Aug 27;10:1971. doi: 10.3389/fmicb.2019.01971 (PMC6719527; doi:10.3389/fmicb.2019.01971)
Supplement: TABLE S5 — Summary of the epidemiological and phenotypic characteristics of cluster A/C and cluster B strains. [file Table_5.XLSX]

## Sheet: Supplementary Table 5
Table S5 – Summary of the epidemiological and phenotypic characteristics of cluster A/C and cluster B strains.
Identifier	Strain	Country	Setting	INF/COL	Cluster	Sequence Type	Clonal Complex	SCCmec type	Growth rate pH7.4 (h-1)	Growth rate pH 7(h-1)	Growth rate pH 5.5 (h-1)	Growth rate pH4.5 (h-1)	Growth rate 2M NaCl (h-1)	Growth rate0.15M NaCl (h-1)	Biofilm pH 7 (OD595nm )	Biofilm pH 5.5 (OD595nm )	Collagen (OD595nm )	Proteolysis halo (mm)	Unbond citocrome C (%)	PEN	ERY	C	LZD	CIP	QD	SXT	DA	TET	FD	RIF	GEN	MIC VAN (μg/ml)	MIC VAN (R/S)	MIC OXA (μg/ml)	MIC OXA(R/S)
314_SS_0397	1076NL	Portugal	Community	Colonization	A/C	307	S307	MSSE	0.896154	0.866016	0.728055	0.203532	0.382397	0.492591	1.68606	0.853667	0.202022	3	5.34351	S	R	S	S	S	S	S	S	S	R	S	S	2	S	0.125	S
318_SS_0401	1243N	Portugal	Community	Colonization	A/C	398	2	MSSE	0.868719	0.733493	0.579281	0.297597	0.271939	0.461182	0.565467	1.55733	0.133011	2.5	12.2137	S	S	S	S	S	S	S	S	S	R	S	S	2	S	0.125	S
319_SS_0402	1290N	Portugal	Community	Colonization	A/C	399	S399	MSSE	0.580382	1.03831	0.383719	0.284232	0.363923	0.603125	4.10744	3.54333	0.118933	2.5	11.0687	R	S	S	S	S	S	S	S	R	R	S	S	1.5	S	0.125	S
322_SS_0405	1340N	Portugal	Community	Colonization	B	402	S402	MSSE	0.722239	0.790483	0.350754	0	0.326789	0.453845	0.305933	0.952667	0.158378	1.5	13.6	S	S	S	S	S	S	S	S	S	S	S	S	0.5	S	0.125	S
251_SS_0334	1347N	Portugal	Community	Colonization	A/C	2	2	MSSE	0.75055	0.733126	0.571304	0.112741	0.377972	0.602455	0.328	0.890633	0.122033	5	12.4	R	S	S	S	S	S	S	S	S	S	S	S	1.5	S	0.19	S
320_SS_0403	1437N	Portugal	Community	Colonization	B	400	S400	MSSE	0.802201	0.531923	0.595414	0.376943	0.251074	0.781687	0.1688	1.925	0.159889	0.5	19.6	R	S	S	S	S	S	S	S	S	S	S	S	2	S	0.25	S
321_SS_0404	1474N	Portugal	Community	Colonization	B	401	S401	MSSE	0.88423	1.00452	0.764337	0.489864	0.297758	0.630651	0.198178	0.784333	0.175378	1.5	10.8	S	R	S	S	S	S	S	S	S	S	S	S	1.5	S	0.094	S
315_SS_0398	148N	Portugal	Community	Colonization	B	390	S390	MSSE	0.79898	0.625822	0.689127	0.145392	0.186411	0.630594	0.818111	2.41167	0.483611	2	42.4	S	S	S	S	S	S	S	S	S	S	S	S	2	S	0.094	S
316_SS_0399	19N	Portugal	Community	Colonization	B	393	S393	MSSE	0.552497	0.531226	0.539893	0.186706	0.342051	0.520883	0.146322	1.01667	0.134889	5	49.1909	S	S	S	S	S	S	S	S	S	S	S	S	2	S	0.064	S
324_SS_0407	56N	Portugal	Community	Colonization	B	403	S403	MSSE	0.940191	0.91772	0.75056	0.244915	0.207441	0.556193	0.409656	2.28	0.191478	0	26.8	S	S	S	S	S	S	S	S	S	S	S	S	1.5	S	0.094	S
306_SS_0389	59N	Portugal	Community	Colonization	A/C	212	2	MSSE	0.773864	0.778742	0.71226	0.191373	0.387009	0.665079	0.520556	1.89267	0.159456	2	3.05344	R	S	S	S	S	S	S	S	S	R	S	S	2	S	0.19	S
323_SS_0406	603N	Portugal	Community	Colonization	B	402	S402	MSSE	0.882698	0.717743	0.41048	0	0.385456	0.780777	0.312333	0.0646667	0.407822	1.5	9.6	S	R	S	S	S	S	S	R	S	S	S	S	0.75	S	0.094	S
317_SS_0400	612N1	Portugal	Community	Colonization	A/C	395	S395	IV	0.584173	0.595747	0.565529	0.196424	0.326068	0.470716	0.204667	2.39567	0.140367	2	6.48855	R	S	S	S	S	S	S	S	S	S	S	S	2	S	64	R*
295_SS_0378	619N1	Portugal	Community	Colonization	A/C	184	2	MSSE	0.541698	0.732776	0.409041	0.24967	0.269959	0.597493	4.25222	2.97932	0.1526	1.5	35.4962	R	S	S	S	S	S	S	S	S	S	S	S	2	S	0.094	S
330_SS_0413	619N2	Portugal	Community	Colonization	A/C	184	2	MSSE	0.704722	0.436793	0.527293	0.28819	0.300435	0.473785	6.15532	3.249	0.212356	1.5	32.6861	R	S	S	S	S	S	S	S	S	S	S	S	2	S	0.094	S
325_SS_0408	675N1	Portugal	Community	Colonization	B	404	S404	MSSE	0.624717	0.569307	0.510485	0.302141	0.302065	0.29513	0.162156	1.92067	0.113556	2	26.4	S	S	S	S	S	S	S	S	S	S	S	S	1.5	S	0.125	S
326_SS_0409	676NR1	Portugal	Community	Colonization	B	405	S405	MSSE	0.57553	0.597691	0.73856	0.370502	0.388505	0.562794	0.304433	3.33933	0.142144	3	27.8626	R	S	S	S	S	S	S	S	S	S	S	S	0.5	S	0.19	S
304_SS_0387	747N1	Portugal	Community	Colonization	A/C	171	171	MSSE	0.791191	0.677024	0.553486	0.291475	0.321218	0.377107	0.317889	1.14826	0.176867	1.5	56.1069	S	S	S	S	S	S	S	S	S	S	S	S	2	S	0.094	S
327_SS_0410	790N	Portugal	Community	Colonization	B	406	S406	MSSE	0.693595	0.932381	0.613997	0.254826	0.351384	0.514078	3.44572	1.48867	0.302833	1	33.5878	S	R	S	S	S	S	S	R	S	S	S	S	1	S	0.094	S
328_SS_0411	803NLR2	Portugal	Community	Colonization	B	407	S407	MSSE	0.551756	1.20839	0.508419	0.361632	0.424964	0.618263	0.0494778	0.908333	0.3862	1.5	14	S	R	S	S	S	S	I	S	S	S	S	S	1.5	S	0.19	S
313_SS_0396	93N	Portugal	Community	Colonization	B	193	S193	MSSE	0.733136	0.757537	0.567129	0.277523	0.303774	0.411598	0.287667	0.682	0.111211	2	67.9389	R	R	S	S	S	S	S	R	R	S	S	S	1.5	S	0.25	S*
329_SS_0412	94N2B	Portugal	Community	Colonization	B	408	S408	MSSE	0.622278	0.70412	0.60525	0.148895	0.28583	0.563178	0.260778	1.44267	0.0559556	6.5	43.6893	S	S	S	S	S	S	S	S	S	S	S	S	1.5	S	0.125	S
267_SS_0350	966N	Portugal	Community	Colonization	A/C	35	2	MSSE	0.795071	0.744098	0.680905	0.470868	0.380123	0.703154	2.416	2.26314	0.458056	2	24.0816	S	R	S	S	S	S	S	S	S	S	S	S	1.5	S	0.094	S
264_SS_0347	AGT24	Argentina	Hospital	Infection	A/C	23	2	B/3	0.644194	0.779195	0.468421	0.277684	0.258017	0.685037	2.10611	0.497567	0.291767	1.5	29.6	R	R	S	S	R	S	S	R	S	S	R	R	2	S	192	R*
302_SS_0385	BUG37	Bulgary	Hospital	Colonization	A/C	19	147	MSSE	0.733929	1.23482	0.987295	0.382051	0.304844	0.490721	0.250667	1.19326	0.150256	2	37.4046	R	S	S	S	S	S	S	S	S	S	S	S	1.5	S	0.19	S
280_SS_0363	BUG46	Bulgary	Hospital	Infection	A/C	58	2	IV	0.902756	0.74229	0.855835	0.231731	0.374838	0.41907	0.798556	1.28078	0.0914444	1	7.7551	R	S	R	S	S	S	S	S	R	S	S	S	1.5	S	1	R
275_SS_0358	COB20	Colombia	Hospital	Infection	A/C	51	2	IV	1.17254	0.70493	0.590299	0.289152	0.40363	0.590388	0.253	0.966444	0.235611	1	20.4082	R	R	R	S	S	S	S	R	S	S	S	R	1.	S	16	R
303_SS_0386	CV13	Cape Verde	Hospital	Colonization	B	369	S369	IV	0.723903	0.674115	0.808486	0.356757	0.325618	0.719124	0.0327556	0.428756	0.113378	0.5	5.72519	R	S	R	S	S	S	R	S	R	S	S	R	1.5	S	256	R*
312_SS_0395	CV20	Cape Verde	Hospital	Colonization	A/C	72	S72	MSSE	0.628346	0.739467	0.737623	0.33589	0.471729	0.491335	3.90633	1.62567	0.185867	2	7.63359	R	S	S	S	S	S	S	S	S	S	S	S	1.5	S	0.125	S
305_SS_0388	CV28	Cape Verde	Hospital	Colonization	A/C	44	2	MSSE	0.858695	0.661623	0.637154	0.299494	0.377381	0.685547	6.05844	2.21313	0.115578	3	5.34351	R	S	S	S	S	S	S	S	R	S	S	S	1.5	S	0.125	S
287_SS_0370	CV45	Cape Verde	Hospital	Colonization	A/C	79	2	IV	0.65289	0.937398	0.636033	0.331658	0.386893	0.741401	0.164278	0.988189	0.0575889	1	10.687	R	S	R	S	S	S	R	S	S	S	R	R	3	S	256	R*
270_SS_0353	DEN107	Denmark	Hospital	Infection	A/C	40	2	IV	1.18592	1.21451	0.700547	0.270651	0.312505	0.559452	0.412444	0.698444	0.139644	1.5	6.53061	R	S	R	S	S	S	S	S	R	S	R	R	2	S	64	R*
301_SS_0384	DEN110	Denmark	Hospital	Colonization	B	68	66	IV	0.760593	0.654646	0.587763	0.310172	0.444318	0.498747	0.138222	3.40512	0.178033	1.5	18.8	R	R	S	S	S	S	S	S	S	R	S	S	2*	S	8	R*
272_SS_0355	DEN116	Denmark	Hospital	Infection	A/C	42	2	I	0.37631	0.611815	0.519077	0.168778	0.264471	0.588443	0.329333	0.578589	0.0788667	1.5	71.8367	R	R	R	S	S	S	R	R	S	S	S	R	1.5	S	256	R
289_SS_0372	DEN161	Denmark	Hospital	Infection	A/C	85	2	IV	1.02183	0.670732	0.656722	0.349459	0.366103	0.683815	2.45633	1.25424	0.329011	2	10.3053	R	S	S	S	S	S	S	S	S	R	S	S	2	S	4	R
254_SS_0337	DEN178	Denmark	Hospital	Infection	A/C	5	2	IV	0.744576	0.533775	0.688593	0.428045	0.391477	0.473386	0.391222	1.13296	0.218111	4	7.2	R	S	S	S	S	S	S	S	S	S	S	S	2	S	64	R*
260_SS_0343	DEN185	Denmark	Hospital	Infection	A/C	21	2	IV	1.08873	0.804132	0.799851	0.509325	0.261038	0.668354	0.245556	0.802856	0.0840444	2.5	10.8	R	S	S	S	S	S	S	S	R	R	S	S	1.5	S	256	R
278_SS_0361	DEN189	Denmark	Hospital	n.a.	A/C	55	2	MSSE	0.680569	0.826839	0.620489	0.272382	0.506352	0.850296	0.427	0.6519	0.283856	3	4.4898	S	S	S	S	S	S	R	S	S	R	S	S	1	S	0.094	S
248_SS_0331	DEN19	Denmark	Hospital	Infection	A/C	1	2	IV	0.796001	0.475566	0.500686	0.528318	0.219098	0.406468	0.417556	2.27303	0.184478	3	44.6602	R	S	S	S	S	S	S	S	S	R	S	R	2	S	256	R
252_SS_0335	DEN22	Denmark	Hospital	Infection	A/C	4	2	IV	0.512037	0.508106	0.630694	0.355703	0.387452	0.65384	0.877556	1.77361	0.2475	0.5	64	R	S	S	S	S	S	S	S	S	R	S	S	1.5	S	24	R*
262_SS_0345	DEN61	Denmark	Hospital	Colonization	A/C	22	2	III	0.737686	0.869412	0.540158	0.262002	0.372531	0.49172	4.43489	0.998133	0.155278	3	22	R	R	S	S	S	S	S	S	S	R	S	S	2	S	256	R
296_SS_0379	DEN62	Denmark	Hospital	Infection	B	11	11	IV	0.942615	0.87217	0.637484	0.444823	0.262708	0.572517	0.263811	1.01054	0.0995889	2	19.2	R	S	S	S	S	S	S	S	S	R	S	R	3	S	192	R
311_SS_0394	DEN69	Denmark	Hospital	Colonization	A/C	56	S56	V	0.860222	0.739982	0.687436	0.254714	0.405154	0.538949	4.12778	1.018	0.106844	3	16.7939	R	S	R	S	S	S	S	S	R	R	S	S	2	S	4	R*
261_SS_0344	DEN73	Denmark	Hospital	Infection	A/C	21	2	C/2	0.990995	0.887121	0.735581	0.505096	0.277912	0.488609	0.487556	0.9836	0.114189	3	16	R	S	S	S	S	S	S	S	S	S	S	S	2*	S	96	R
257_SS_0340	DEN76	Denmark	Hospital	Infection	A/C	14	2	MSSE	0.785616	0.599405	0.433281	0.361792	0.305456	0.554078	0.156	0.364544	0.151167	2	12	R	S	S	S	S	S	S	S	S	S	S	S	2	S	0.19	S
285_SS_0368	GRE34	Greece	Hospital	n.a.	A/C	69	2	NT/2	0.918046	0.734566	0.752195	0.400657	0.364385	0.673717	3.78944	0.689111	0.181944	2.5	18.7023	R	R	S	S	S	S	R	S	S	S	S	S	1.5	S	256	R*
288_SS_0371	GRE41	Greece	Hospital	Infection	A/C	83	2	IV	0.724689	0.765717	0.69046	0.34104	0.41699	0.694096	5.67644	1.11183	0.212122	2	6.87023	R	R	S	S	S	S	S	S	S	R	S	R	2	S	256	R*
310_SS_0393	GRE53	Greece	Hospital	n.a.	B	39	S39	C/2	0.640841	0.659294	0.530339	0.239272	0.222141	0.523392	0.383222	2.42333	0.132689	1.5	11.2	S	S	S	S	S	S	S	S	S	R	S	S	2	S	6	R*
294_SS_0377	HFA6096	Portugal	Hospital	Colonization	A/C	90	2	MSSE	0.8736	0.729415	0.461518	0.237041	0.292227	0.687896	3.72222	1.45572	0.146489	2	12.2137	R	S	S	S	S	S	S	S	S	S	S	S	2	S	0.19	S
279_SS_0362	HFA6162	Portugal	Hospital	Colonization	A/C	57	2	MSSE	0.657304	0.60281	0.533405	0.342987	0.405258	0.591804	0.262056	3.03727	0.2529	3	23.6735	S	S	S	S	R	S	R	S	R	S	S	S	1.5	S	0.064	S
307_SS_0390	HFA6173B	Portugal	Hospital	Colonization	B	37	247	IV	0.553814	0.721248	0.697003	0.372015	0.305896	0.653728	0.0786666	1.56667	0.0735889	1.5	25.2	R	R	S	S	S	S	R	S	R	R	S	S	2	S	256	R
258_SS_0341	HFA6181	Portugal	Hospital	Colonization	A/C	17	2	MSSE	0.929685	0.801073	0.732052	0.333179	0.254531	0.435311	0.285444	1.0831	0.0510556	2	18.8	R	S	S	S	S	S	S	S	S	S	S	S	1.5	S	0.125	S
282_SS_0365	HFA6226	Portugal	Hospital	Colonization	A/C	60	2	MSSE	0.640962	0.674006	0.525584	0.340259	0.2452	0.577242	0.463111	2.57099	0.122889	1.5	9.54198	S	S	S	S	S	S	S	S	S	S	S	S	1.5	S	0.064	S
263_SS_0346	HFA6228	Portugal	Hospital	Colonization	A/C	22	2	A/C	0.991764	1.00388	0.756813	0.273262	0.374953	0.635444	3.88544	0.9317	0.173422	3	7.2	R	R	S	S	S	S	S	S	S	R	S	S	2	S	256	R*
292_SS_0375	HFA6286	Portugal	Hospital	Colonization	A/C	88	2	MSSE	0.761569	0.647139	0.511263	0.438367	0.368773	0.51845	0.230633	1.14558	0.138278	3	11.4504	R	R	S	S	S	S	S	S	S	R	S	S	2	S	0.047	S
286_SS_0369	HFA6391	Portugal	Hospital	Colonization	A/C	73	2	MSSE	0.881765	0.661386	0.676486	0.735352	0.344842	0.525184	0.327478	0.782378	0.151244	2	15.2672	R	S	S	S	S	S	S	S	S	S	S	S	2	S	0.094	S
265_SS_0348	HUR105	Hungary	Hospital	Infection	A/C	23	2	IV	0.854321	0.712563	0.386555	0.247246	0.319717	0.61635	0.156333	0.545878	0.183789	1	24.4898	R	R	S	S	R	S	S	R	R	S	R	R	2	S	192	R
299_SS_0382	HUR51	Hungary	Hospital	Infection	B	47	33	B/3	0.845576	0.730077	0.626806	0.373675	0.143589	0.640115	0.1928	0.473744	0.166589	2	9.2	R	R	S	S	S	S	R	S	S	S	S	S	1.5	S	3	R*
276_SS_0359	ICE102	Iceland	Hospital	Infection	A/C	52	2	IV	0.896949	0.612003	0.694099	0.398039	0.292764	0.774587	0.404967	1.29417	0.155467	3.5	15.5102	R	S	S	S	S	S	R	S	R	S	S	R	1.5	S	256	R*
293_SS_0376	ICE120	Iceland	Hospital	Infection	A/C	89	2	IV	0.727189	0.687865	0.593211	0.356811	0.319035	0.796061	0.348111	1.0665	0.131133	1	7.63359	R	R	R	S	S	S	S	S	S	R	S	R	3	S	256	R
273_SS_0356	ICE122	Iceland	Hospital	Colonization	A/C	42	2	I	0.622588	0.726005	0.627067	0.56149	0.35167	0.560973	0.183222	2.63142	0.138411	2.5	42.449	R	S	S	S	R	S	R	R	R	R	S	R	1.5	S	256	R
249_SS_0332	ICE18	Iceland	Hospital	Colonization	A/C	1	2	IV	0.493589	0.617799	0.67678	0.220827	0.319587	0.479339	0.290444	1.66226	0.308411	1	20	S	R	R	S	S	S	R	R	S	R	S	R	2	S	16	R*
253_SS_0336	ICE192	Iceland	Hospital	Infection	A/C	5	2	IV	0.929483	0.790163	0.384912	0.432983	0.332602	0.81639	0.328778	1.19218	0.106856	3	16	R	S	S	S	R	S	S	S	R	R	S	S	1.5	S	48	R
268_SS_0351	ICE21	Iceland	Hospital	Infection	A/C	36	2	I	0.690439	0.874619	0.560687	0.346008	0.298075	0.53978	0.251333	1.70922	0.0970556	2.5	35.5102	R	S	R	S	R	S	R	S	R	R	S	R	2	S	256	R
269_SS_0352	ICE24	Iceland	Hospital	n.a.	A/C	38	2	IV	0.748251	0.727246	0.604301	0.482083	0.300977	0.679689	0.171444	1.08347	0.145178	3	39.1837	R	R	S	S	S	S	R	S	R	R	S	S	2	S	6	R*
266_SS_0349	ICE26	Iceland	Hospital	Infection	A/C	34	2	IV	0.790547	0.552621	0.66431	0.352179	0.367883	0.737254	0.352778	2.2576	0.216444	3.5	15.9184	R	R	S	S	S	S	R	R	S	S	S	R	2	S	256	R*
250_SS_0333	ICE7	Iceland	Hospital	Infection	A/C	2	2	III	0.933846	0.776163	0.647466	0.277767	0.292053	0.646638	0.342778	1.05812	0.289811	2	33.2	R	R	R	S	S	S	R	S	S	S	S	R	2	S	256	R
271_SS_0354	ICE87	Iceland	Hospital	Infection	A/C	40	2	A/C,4	0.750319	0.699133	0.637204	0.190646	0.268178	0.786621	0.352111	2.70664	0.162278	2	7.34694	R	S	S	S	S	S	R	S	S	S	S	R	0.75	S	256	R
255_SS_0338	ICE9	Iceland	Hospital	Infection	A/C	6	2	III	0.737658	0.619424	0.689109	0.668212	0.357849	0.643691	0.339667	1.37114	0.266189	3	28.8	R	R	S	S	R	S	R	R	S	S	S	R	1.5	S	256	R
256_SS_0339	ICE95	Iceland	Hospital	Colonization	A/C	10	2	IV	0.709735	0.701146	0.626188	0.294311	0.416506	0.712446	6.30467	1.41409	0.195344	1.5	15.2	R	R	S	S	S	S	R	R	S	S	S	S	1.5	S	32	R*
259_SS_0342	ICE99	Iceland	Hospital	Colonization	A/C	20	2	IV	0.873196	0.808213	0.703112	0.393585	0.467155	0.665618	0.183889	0.6604	0.191711	1	24	R	S	S	S	S	S	S	S	R	S	S	S	2	S	64	R*
309_SS_0392	ITL299	Italy	Hospital	Infection	A/C	32	S32	MSSE	0.81234	0.92579	0.596442	0.218395	0.365426	0.753332	1.06333	1.73333	0.206356	3	7.63359	R	S	S	S	S	S	S	S	S	S	S	S	2	S	0.19	S
300_SS_0383	ITL34	Italy	Hospital	Infection	B	66	66	IV	0.659204	0.587986	0.645546	0.159473	0.706251	0.462181	0.281989	4.83679	0.235778	2	17.2	R	R	S	S	S	S	S	R	S	S	S	S	2	S	256	R
298_SS_0381	JAP263	Japan	Hospital	Infection	B	33	33	II	0.693489	0.510675	0.545654	0.316255	0.270306	0.341123	0.235789	0.596967	0.104944	1	25.2	R	S	S	S	S	S	S	S	S	S	S	S	1.5	S	96	R
277_SS_0360	JAP271	Japan	Hospital	Colonization	A/C	54	2	MSSE	0.58599	0.504087	0.44365	0.2542	0.183185	0.462526	0.710189	1.47929	0.313989	0	64.4898	R	S	S	S	R	S	S	S	R	S	S	S	1.5	S	0.094	S*
274_SS_0357	MCO150	Mexico	Hospital	Infection	A/C	46	2	IV	0.879938	0.826892	0.798538	0.281853	0.331573	0.848994	0.414556	2.06442	0.456067	3	30.2041	R	R	R	S	S	S	R	R	S	S	S	R	1.5	S	256	R
308_SS_0391	MEX35	Mexico	Hospital	Infection	B	49	247	IV	0.987886	0.94633	0.639499	0.399077	0.308912	0.567829	0.108356	0.685667	0.0650667	6	66.8	R	R	S	S	S	S	R	S	S	S	S	S	2	S	3	R*
297_SS_0380	MEX37	Mexico	Hospital	Infection	B	71	11	II	0.568035	0.420754	0.497534	0.287766	0.250377	0.263497	0.116333	0.678267	0.0358889	1.5	37.5405	R	R	S	S	S	S	S	R	S	S	S	S	2	S	256	R
283_SS_0366	MEX60	Mexico	Hospital	Infection	A/C	61	2	NT/2	0.81867	0.873623	0.712371	0.304442	0.319032	0.795103	0.646556	3.05722	0.0919333	3	12.5954	R	R	S	S	S	S	R	S	S	S	S	R	1.5	S	12	R
284_SS_0367	MEX61	Mexico	Hospital	Infection	A/C	61	2	IV	0.866036	0.764106	0.723988	0.368987	0.329265	0.92443	0.469022	3.04119	0.1875	3	8.77863	R	R	S	S	S	S	R	S	S	S	S	R	1.5	S	16	R*
290_SS_0373	TAW113	Taiwan	Hospital	Infection	A/C	85	2	MSSE	1.04383	0.892585	0.576852	0.270426	0.322644	0.671076	0.287111	1.05626	0.211033	3	11.8321	R	S	S	S	S	S	S	S	R	S	S	S	2	S	0.38	S*
281_SS_0364	TAW60	Taiwan	Hospital	Colonization	A/C	59	2	MSSE	0.750291	0.724641	0.712112	0.364138	0.30227	0.628485	0.379733	3.10277	0.158189	3.5	9.92366	R	S	S	S	S	S	R	S	S	S	S	S	1.5	S	0.5	R*
291_SS_0374	URU23	Uruguay	Hospital	Infection	A/C	86	2	IV	0.6636	0.619458	0.697255	0.389046	0.412183	0.682147	7.00087	1.19503	0.366422	1	8.01527	R	R	S	S	S	S	R	R	S	S	S	R	2	S	2	R
	Legend:
	n.a: does not have information
	* heterogeneous profile
	penicillin (PEN), oxacillin (OXA), erythromycin (ERY), clindamicin (DA), cloramphenicol (C), rifampicin (RIF), linezolid (LZD), ciprofloxacin (CIP), quinopristin-dalfopristin (QD), trimethoprim-sulphamethoxazole (SXT), tetracyclin (TET), fusidic acid (FD), gentamicin (GEN) and vancomycin (VAN).
